# Supplementary material for: Construction and validation of an oxidative-stress-related risk model for predicting the prognosis of osteosarcoma
Source: publisher site journal article supplement (doi:10.18632/aging.204764), 2023-06-02
Supplement: Supplementary file [file aging-v15i11-204764-supplementary-material-SD1.pdf]

SUPPLEMENTARY FIGURE

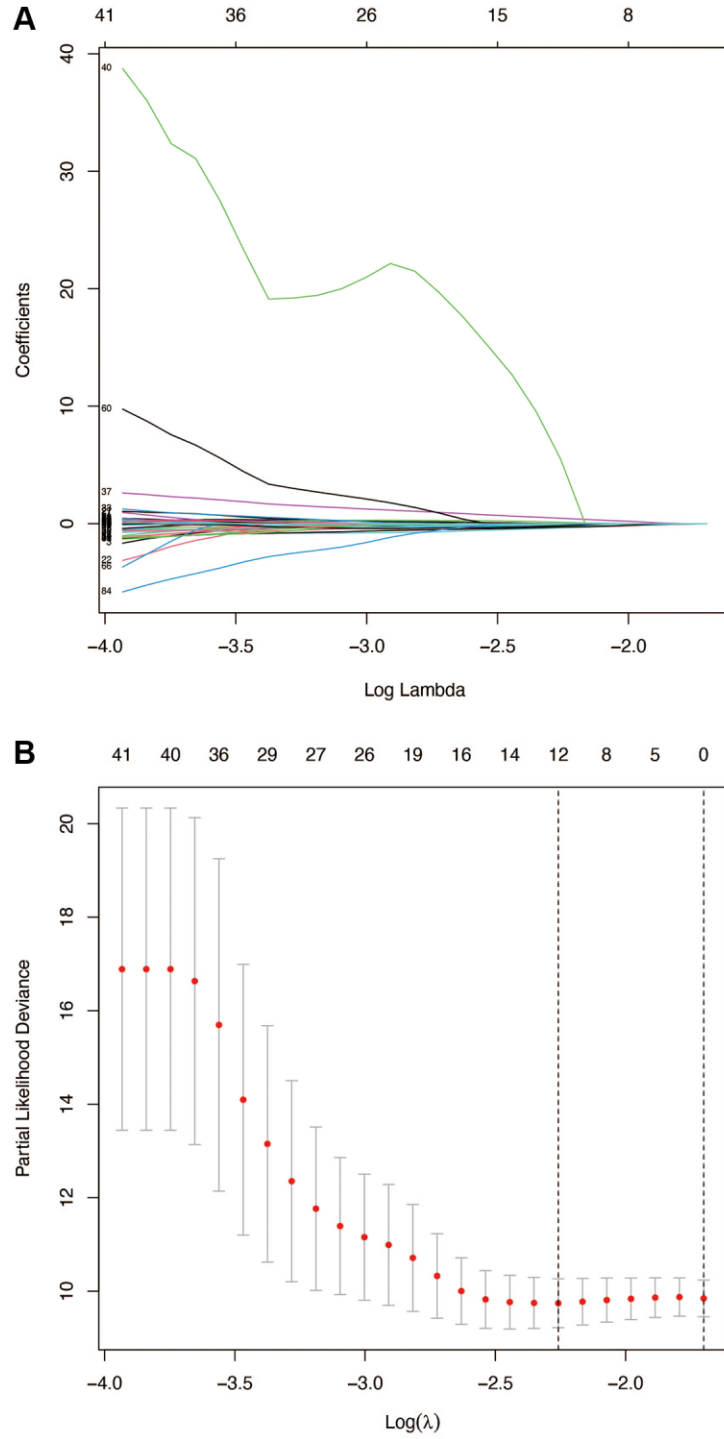

Supplementary Figure 1. LASSO regression analysis with optimal lambda.
