# Supplementary material for: Construction and validation of an oxidative-stress-related risk model for predicting the prognosis of osteosarcoma
Source: publisher site journal article supplement (doi:10.18632/aging.204764), 2023-06-02
Supplement: Supplementary file [file aging-v15i11-204764-supplementary-material-SD2.pdf]

## SUPPLEMENTARY TABLES

**Supplementary Table 1. 89 OS-related genes in osteosarcoma identified by univariate cox regression analysis.**

| Gene    | HR               | HR.95L    | HR.95H                  | p-value |
|---------|------------------|-----------|-------------------------|---------|
| CAT     | 0.332            | 0.164     | 0.671                   | 0.002   |
| HMOX1   | 0.721            | 0.530     | 0.981                   | 0.037   |
| MAPK1   | 0.388            | 0.178     | 0.848                   | 0.018   |
| G6PD    | 0.376            | 0.188     | 0.752                   | 0.006   |
| TXN2    | 0.422            | 0.204     | 0.871                   | 0.020   |
| GPX1    | 0.636            | 0.412     | 0.980                   | 0.040   |
| ACADVL  | 2.886            | 1.374     | 6.065                   | 0.005   |
| MAP3K5  | 0.286            | 0.120     | 0.682                   | 0.005   |
| CCL2    | 0.553            | 0.363     | 0.842                   | 0.006   |
| INS     | 15608084289545.4 | 15654.959 | 15561349814940800000000 | 0.004   |
| ATF4    | 1.845            | 1.087     | 3.131                   | 0.023   |
| EIF2AK3 | 2.416            | 1.197     | 4.878                   | 0.014   |
| FMO3    | 0.388            | 0.157     | 0.964                   | 0.041   |
| IL10    | 0.020            | 0.001     | 0.629                   | 0.026   |
| ACE     | 0.305            | 0.095     | 0.981                   | 0.046   |
| PPARG   | 0.426            | 0.257     | 0.708                   | 0.001   |
| NUDT1   | 1.965            | 1.146     | 3.369                   | 0.014   |
| TLR4    | 0.495            | 0.261     | 0.938                   | 0.031   |
| MAOB    | 1.519            | 1.015     | 2.274                   | 0.042   |
| SFXN4   | 3.580            | 1.593     | 8.042                   | 0.002   |
| ATM     | 1.735            | 1.054     | 2.857                   | 0.030   |
| VCAM1   | 0.589            | 0.405     | 0.858                   | 0.006   |
| GPX7    | 2.302            | 1.262     | 4.197                   | 0.007   |
| KCNJ5   | 0.189            | 0.061     | 0.587                   | 0.004   |
| CD36    | 1.601            | 1.156     | 2.217                   | 0.005   |
| CYP2C19 | 5205.861         | 6.620     | 4093638.921             | 0.012   |
| MB      | 1.169            | 1.015     | 1.347                   | 0.030   |
| BLVRB   | 0.519            | 0.312     | 0.862                   | 0.011   |
| MAP2K4  | 0.523            | 0.287     | 0.953                   | 0.034   |
| EME2    | 4.008            | 1.028     | 15.627                  | 0.046   |
| AGTR1   | 0.516            | 0.294     | 0.903                   | 0.020   |
| CYGB    | 1.624            | 1.034     | 2.549                   | 0.035   |
| MRPS23  | 0.309            | 0.114     | 0.837                   | 0.021   |
| PIK3CG  | 0.289            | 0.112     | 0.748                   | 0.010   |
| ADH5    | 0.344            | 0.147     | 0.807                   | 0.014   |
| CBS     | 2.188            | 1.269     | 3.771                   | 0.005   |
| ANXA5   | 0.461            | 0.223     | 0.952                   | 0.036   |
| TERT    | 4.444            | 2.120     | 9.314                   | 0.000   |
| MAP2K7  | 2.826            | 1.346     | 5.931                   | 0.006   |
| EGFR    | 0.610            | 0.401     | 0.928                   | 0.021   |
| TPD52   | 2.577            | 1.509     | 4.399                   | 0.001   |
| NDUFV1  | 2.627            | 1.082     | 6.378                   | 0.033   |
| TLR2    | 0.357            | 0.162     | 0.786                   | 0.011   |
| CYP11B2 | 402875.664       | 13.324    | 12181370764.833         | 0.014   |

|          |          |       |             |       |
|----------|----------|-------|-------------|-------|
| PGD      | 0.364    | 0.183 | 0.726       | 0.004 |
| MAPKAPK3 | 0.508    | 0.275 | 0.940       | 0.031 |
| INSR     | 2.307    | 1.231 | 4.326       | 0.009 |
| NDUFB9   | 1.478    | 1.053 | 2.074       | 0.024 |
| CRAT     | 0.471    | 0.278 | 0.798       | 0.005 |
| TNFRSF1A | 0.360    | 0.199 | 0.653       | 0.001 |
| PTPN1    | 0.432    | 0.189 | 0.984       | 0.046 |
| LOX      | 1.745    | 1.222 | 2.491       | 0.002 |
| SUOX     | 0.294    | 0.090 | 0.959       | 0.042 |
| BMP2     | 1.363    | 1.007 | 1.844       | 0.045 |
| ALDH1A1  | 0.619    | 0.399 | 0.959       | 0.032 |
| NOL3     | 1.999    | 1.190 | 3.359       | 0.009 |
| RPS27A   | 2.068    | 1.044 | 4.096       | 0.037 |
| AOC3     | 2.115    | 1.299 | 3.443       | 0.003 |
| CYP2C8   | 2.816    | 1.142 | 6.942       | 0.025 |
| MYC      | 2.246    | 1.439 | 3.505       | 0.000 |
| CYP2A6   | 0.001    | 0.000 | 0.706       | 0.040 |
| PRNP     | 0.506    | 0.285 | 0.898       | 0.020 |
| PAH      | 69.244   | 1.223 | 3921.661    | 0.040 |
| CYP27A1  | 0.584    | 0.375 | 0.910       | 0.018 |
| FAAH     | 1.696    | 1.115 | 2.580       | 0.014 |
| OGDH     | 0.288    | 0.126 | 0.660       | 0.003 |
| NDUFB10  | 0.529    | 0.290 | 0.966       | 0.038 |
| TG       | 2.133    | 1.092 | 4.166       | 0.027 |
| PTS      | 2.438    | 1.203 | 4.942       | 0.013 |
| MAPKAP1  | 0.257    | 0.085 | 0.771       | 0.015 |
| CASP1    | 0.588    | 0.358 | 0.967       | 0.036 |
| AS3MT    | 34.423   | 4.283 | 276.687     | 0.001 |
| CHEK1    | 1.916    | 1.056 | 3.477       | 0.032 |
| ADRB1    | 2.475    | 1.362 | 4.497       | 0.003 |
| EPHX2    | 2.183    | 1.140 | 4.180       | 0.019 |
| SCARB1   | 1.571    | 1.093 | 2.258       | 0.015 |
| PXN      | 0.390    | 0.164 | 0.924       | 0.032 |
| PRKD2    | 0.377    | 0.146 | 0.975       | 0.044 |
| KCNMA1   | 2.430    | 1.382 | 4.272       | 0.002 |
| UGT1A6   | 4651.907 | 3.283 | 6591366.350 | 0.023 |
| TREM2    | 0.661    | 0.453 | 0.965       | 0.032 |
| IGF1R    | 1.584    | 1.142 | 2.196       | 0.006 |
| MUC1     | 1.457    | 1.106 | 1.921       | 0.008 |
| PTGIS    | 1.500    | 1.069 | 2.105       | 0.019 |
| ITGAM    | 0.424    | 0.233 | 0.773       | 0.005 |
| KRAS     | 0.446    | 0.204 | 0.976       | 0.043 |
| MSR1     | 0.604    | 0.370 | 0.986       | 0.044 |
| PTPN3    | 1.973    | 1.076 | 3.618       | 0.028 |

**Supplementary Table 2. OS-related gene expression set obtained after lasso regression.**

| <b>id</b> | <b>TXN2</b> | <b>MAP3K5</b> | <b>G6PD</b> | <b>HMOX1</b> | <b>ATF4</b> | <b>CAT</b> | <b>ACADVL</b> | <b>MAPK1</b> | <b>INS</b> | <b>EIF2AK3</b> | <b>CCL2</b> | <b>MAPK10</b> |
|-----------|-------------|---------------|-------------|--------------|-------------|------------|---------------|--------------|------------|----------------|-------------|---------------|
| 1         | 6.12        | 4.11          | 4.93        | 7.20         | 8.54        | 6.11       | 6.66          | 6.40         | 2.77       | 5.52           | 4.87        | 3.68          |
| 2         | 6.39        | 3.84          | 5.51        | 8.24         | 9.14        | 5.30       | 8.13          | 5.80         | 2.77       | 4.42           | 7.48        | 3.08          |
| 3         | 6.13        | 3.91          | 5.62        | 6.75         | 7.95        | 6.30       | 8.47          | 6.07         | 2.77       | 5.04           | 4.67        | 2.97          |
| 4         | 7.13        | 3.79          | 4.87        | 4.69         | 8.43        | 5.59       | 7.85          | 6.38         | 2.77       | 5.42           | 3.31        | 3.33          |
| 5         | 6.22        | 3.11          | 5.22        | 4.15         | 8.38        | 6.77       | 6.60          | 6.09         | 2.77       | 4.67           | 3.83        | 3.08          |
| 6         | 6.17        | 3.54          | 5.45        | 5.70         | 8.09        | 5.48       | 7.28          | 5.60         | 2.77       | 5.72           | 3.22        | 2.99          |
| 7         | 6.60        | 4.56          | 4.66        | 5.80         | 9.94        | 5.39       | 7.16          | 6.20         | 2.87       | 5.32           | 2.99        | 2.90          |
| 8         | 5.57        | 3.41          | 5.60        | 5.31         | 7.59        | 5.62       | 6.70          | 6.54         | 2.77       | 5.58           | 3.19        | 3.42          |
| 9         | 6.47        | 3.79          | 5.73        | 6.75         | 9.30        | 5.52       | 9.03          | 5.67         | 2.77       | 4.94           | 5.04        | 2.97          |
| 10        | 6.92        | 4.82          | 5.48        | 9.44         | 8.81        | 6.08       | 7.95          | 6.24         | 2.77       | 4.47           | 4.14        | 3.75          |
| 11        | 6.91        | 3.92          | 4.88        | 6.29         | 9.37        | 6.12       | 7.97          | 7.25         | 2.77       | 5.17           | 4.75        | 2.97          |
| 12        | 5.15        | 3.52          | 5.37        | 5.95         | 9.93        | 4.88       | 7.78          | 6.36         | 2.77       | 5.22           | 2.84        | 2.91          |
| 13        | 6.51        | 3.54          | 5.05        | 7.92         | 8.49        | 6.56       | 7.71          | 7.11         | 2.77       | 5.35           | 4.34        | 2.94          |
| 14        | 6.62        | 3.28          | 4.94        | 5.97         | 9.20        | 5.39       | 8.80          | 6.77         | 2.77       | 5.87           | 3.39        | 2.98          |
| 15        | 6.48        | 3.28          | 4.48        | 6.40         | 9.62        | 4.86       | 7.51          | 7.05         | 2.77       | 5.63           | 3.07        | 4.60          |
| 16        | 6.99        | 4.34          | 5.37        | 9.99         | 9.27        | 5.76       | 8.37          | 6.14         | 2.77       | 4.82           | 6.01        | 3.17          |
| 17        | 5.83        | 3.81          | 5.73        | 4.86         | 7.75        | 5.75       | 6.86          | 6.13         | 2.77       | 5.14           | 3.06        | 3.03          |
| 18        | 6.48        | 5.00          | 5.72        | 6.00         | 8.07        | 6.40       | 7.47          | 6.32         | 2.77       | 4.76           | 6.43        | 2.96          |
| 19        | 6.49        | 3.75          | 5.17        | 6.96         | 9.58        | 5.84       | 8.15          | 6.93         | 2.76       | 5.12           | 3.55        | 3.18          |
| 20        | 7.92        | 6.01          | 4.68        | 6.24         | 9.72        | 6.36       | 7.71          | 7.67         | 2.77       | 4.93           | 3.47        | 2.99          |
| 21        | 6.47        | 4.71          | 5.20        | 10.35        | 8.05        | 7.15       | 7.81          | 6.58         | 2.77       | 4.55           | 7.25        | 2.94          |
| 22        | 7.25        | 3.87          | 5.76        | 7.05         | 8.31        | 5.74       | 7.23          | 5.81         | 2.77       | 4.25           | 6.28        | 3.24          |
| 23        | 6.55        | 3.90          | 5.05        | 6.71         | 8.39        | 6.10       | 7.51          | 6.29         | 2.76       | 4.70           | 4.15        | 3.99          |
| 24        | 5.92        | 3.74          | 5.13        | 7.53         | 8.44        | 5.84       | 7.31          | 6.62         | 2.77       | 5.48           | 4.74        | 2.95          |
| 25        | 6.32        | 3.96          | 5.44        | 6.59         | 9.22        | 6.27       | 7.22          | 6.79         | 2.77       | 5.77           | 4.74        | 2.95          |
| 26        | 6.60        | 3.92          | 4.86        | 6.00         | 8.59        | 6.34       | 6.78          | 6.44         | 2.77       | 4.83           | 4.09        | 3.15          |
| 27        | 6.43        | 4.58          | 5.64        | 9.58         | 8.13        | 6.36       | 7.07          | 6.70         | 2.77       | 4.33           | 5.03        | 3.65          |
| 28        | 7.04        | 3.69          | 5.02        | 5.84         | 10.56       | 5.85       | 6.84          | 6.66         | 2.76       | 3.70           | 3.42        | 3.58          |
| 29        | 6.78        | 4.20          | 6.28        | 6.99         | 9.23        | 5.58       | 7.75          | 6.28         | 2.76       | 4.64           | 5.39        | 4.12          |
| 30        | 7.23        | 3.39          | 5.79        | 6.31         | 9.64        | 6.04       | 8.40          | 6.77         | 2.78       | 5.54           | 3.66        | 3.86          |
| 31        | 5.59        | 3.65          | 4.90        | 8.92         | 9.08        | 5.90       | 7.26          | 6.35         | 2.77       | 5.13           | 4.33        | 3.42          |
| 32        | 6.91        | 4.14          | 5.81        | 7.61         | 8.36        | 5.98       | 7.67          | 7.17         | 2.77       | 5.57           | 3.52        | 3.08          |
| 33        | 6.75        | 4.32          | 5.33        | 6.56         | 9.29        | 5.38       | 7.73          | 6.07         | 2.77       | 5.14           | 5.03        | 3.18          |
| 34        | 6.06        | 3.34          | 5.13        | 6.11         | 9.32        | 4.67       | 7.51          | 5.84         | 2.77       | 5.93           | 3.21        | 2.93          |
| 35        | 6.50        | 3.57          | 5.16        | 6.23         | 8.58        | 5.80       | 7.50          | 5.66         | 2.76       | 5.06           | 4.39        | 2.93          |
| 36        | 6.72        | 5.07          | 6.89        | 8.91         | 8.60        | 6.39       | 7.21          | 6.22         | 2.77       | 5.06           | 5.46        | 3.35          |
| 37        | 7.12        | 3.41          | 5.21        | 6.22         | 9.34        | 6.58       | 7.30          | 6.13         | 2.77       | 3.98           | 3.86        | 3.88          |
| 38        | 6.70        | 4.47          | 4.51        | 5.19         | 8.83        | 4.71       | 7.77          | 5.53         | 2.76       | 4.76           | 3.23        | 3.00          |
| 39        | 6.38        | 3.37          | 5.40        | 4.78         | 8.76        | 5.20       | 8.02          | 6.41         | 2.77       | 4.76           | 3.11        | 3.38          |
| 40        | 6.84        | 4.08          | 5.56        | 9.65         | 9.51        | 5.54       | 7.76          | 6.45         | 2.77       | 4.66           | 7.13        | 3.37          |
| 41        | 6.66        | 3.75          | 5.81        | 6.89         | 8.45        | 6.41       | 7.31          | 6.06         | 2.77       | 4.70           | 4.88        | 2.97          |
| 42        | 6.60        | 4.16          | 5.75        | 8.96         | 8.21        | 5.87       | 7.92          | 6.04         | 2.77       | 4.79           | 6.27        | 3.10          |
| 43        | 7.26        | 4.04          | 6.49        | 8.30         | 9.29        | 6.08       | 7.92          | 6.06         | 2.76       | 4.67           | 5.12        | 3.49          |
| 44        | 6.16        | 3.97          | 5.68        | 6.13         | 7.67        | 5.84       | 6.87          | 6.06         | 2.77       | 4.48           | 4.43        | 3.34          |
| 45        | 6.29        | 3.63          | 5.36        | 8.31         | 7.82        | 5.58       | 7.25          | 6.80         | 2.77       | 4.65           | 4.15        | 3.43          |
| 46        | 5.87        | 3.97          | 5.46        | 6.90         | 9.09        | 6.81       | 8.08          | 6.05         | 2.76       | 5.27           | 3.75        | 2.97          |

|    |      |      |      |      |       |      |      |      |      |      |      |      |
|----|------|------|------|------|-------|------|------|------|------|------|------|------|
| 47 | 6.68 | 3.94 | 5.11 | 7.01 | 9.32  | 6.25 | 6.82 | 6.51 | 2.77 | 5.18 | 4.21 | 2.93 |
| 48 | 7.04 | 4.16 | 5.04 | 6.34 | 9.20  | 6.07 | 7.70 | 6.61 | 2.77 | 4.79 | 4.38 | 3.39 |
| 49 | 7.04 | 4.43 | 5.81 | 6.63 | 8.56  | 5.86 | 7.11 | 6.93 | 2.77 | 5.40 | 5.07 | 3.60 |
| 50 | 6.78 | 3.15 | 5.54 | 6.68 | 8.48  | 6.05 | 8.23 | 6.18 | 2.77 | 5.13 | 4.74 | 2.97 |
| 51 | 6.72 | 4.13 | 5.61 | 5.31 | 9.40  | 5.55 | 6.19 | 6.18 | 2.77 | 4.81 | 4.41 | 3.01 |
| 52 | 6.74 | 3.83 | 5.19 | 7.17 | 9.58  | 5.71 | 7.98 | 6.03 | 2.77 | 5.38 | 4.36 | 3.00 |
| 53 | 7.47 | 4.28 | 5.43 | 5.97 | 8.71  | 5.49 | 8.13 | 5.28 | 2.77 | 3.50 | 3.59 | 4.08 |
| 54 | 6.95 | 3.74 | 6.29 | 8.93 | 9.02  | 5.82 | 7.66 | 6.21 | 2.77 | 5.09 | 3.97 | 3.00 |
| 55 | 7.60 | 4.31 | 6.01 | 6.81 | 10.15 | 5.50 | 7.47 | 6.37 | 2.76 | 5.00 | 4.75 | 4.29 |
| 56 | 6.55 | 3.78 | 4.95 | 6.18 | 8.77  | 5.48 | 6.57 | 7.02 | 2.77 | 5.22 | 4.53 | 3.63 |
| 57 | 5.48 | 4.03 | 5.39 | 5.10 | 8.00  | 5.67 | 7.72 | 6.00 | 2.77 | 5.09 | 3.99 | 3.08 |
| 58 | 6.37 | 3.67 | 5.84 | 5.73 | 8.85  | 6.01 | 7.48 | 6.81 | 2.77 | 4.03 | 4.90 | 3.18 |
| 59 | 6.32 | 3.64 | 6.14 | 9.41 | 8.44  | 6.10 | 7.63 | 6.33 | 2.77 | 4.13 | 5.72 | 3.03 |
| 60 | 7.77 | 5.23 | 7.33 | 6.85 | 9.68  | 5.34 | 7.65 | 5.80 | 2.77 | 3.69 | 7.09 | 3.09 |
| 61 | 6.23 | 3.11 | 5.73 | 5.53 | 8.62  | 6.07 | 6.96 | 7.81 | 2.77 | 4.48 | 3.68 | 4.80 |
| 62 | 7.21 | 3.67 | 6.63 | 7.03 | 8.33  | 5.43 | 7.35 | 5.39 | 2.77 | 3.37 | 5.21 | 3.81 |
| 63 | 7.33 | 4.24 | 5.79 | 6.87 | 8.36  | 5.90 | 6.92 | 6.39 | 2.77 | 4.21 | 7.27 | 2.93 |
| 64 | 6.95 | 3.56 | 6.01 | 7.80 | 9.42  | 5.95 | 7.80 | 6.27 | 2.77 | 4.99 | 5.73 | 3.23 |
| 65 | 6.49 | 3.80 | 4.71 | 6.65 | 8.74  | 5.80 | 7.78 | 6.08 | 2.77 | 4.83 | 3.92 | 2.94 |
| 66 | 6.80 | 4.21 | 5.47 | 5.21 | 7.83  | 6.43 | 7.17 | 5.48 | 2.77 | 4.68 | 4.77 | 2.95 |
| 67 | 6.20 | 5.08 | 5.28 | 6.50 | 8.69  | 4.82 | 6.93 | 6.47 | 2.77 | 5.26 | 4.74 | 2.96 |
| 68 | 6.89 | 3.57 | 5.67 | 8.12 | 9.34  | 4.93 | 7.95 | 5.56 | 2.77 | 6.16 | 4.27 | 3.11 |
| 69 | 6.15 | 5.14 | 6.63 | 6.07 | 8.53  | 5.94 | 8.59 | 6.52 | 2.77 | 5.66 | 4.33 | 3.20 |
| 70 | 7.44 | 4.88 | 5.21 | 6.24 | 9.27  | 6.29 | 8.12 | 6.59 | 2.76 | 5.63 | 5.68 | 3.24 |
| 71 | 5.73 | 3.32 | 4.42 | 8.36 | 8.82  | 5.89 | 6.94 | 5.72 | 2.77 | 5.23 | 5.05 | 3.23 |
| 72 | 6.76 | 3.26 | 5.69 | 8.65 | 8.33  | 5.69 | 7.71 | 6.66 | 2.77 | 4.68 | 4.66 | 3.03 |
| 73 | 6.76 | 3.80 | 7.09 | 8.26 | 9.01  | 6.10 | 8.18 | 6.30 | 2.77 | 5.31 | 5.48 | 2.98 |
| 74 | 7.12 | 4.02 | 5.79 | 8.12 | 9.69  | 4.22 | 7.62 | 6.41 | 2.77 | 4.72 | 6.94 | 3.16 |
| 75 | 6.70 | 4.43 | 6.36 | 8.24 | 8.77  | 5.63 | 7.50 | 6.06 | 2.77 | 4.56 | 6.13 | 3.34 |
| 76 | 7.19 | 3.80 | 6.18 | 8.38 | 8.53  | 5.39 | 7.44 | 6.13 | 2.77 | 4.59 | 5.36 | 3.08 |
| 77 | 6.92 | 3.58 | 5.96 | 7.89 | 10.56 | 5.28 | 8.08 | 6.48 | 2.76 | 5.67 | 3.77 | 3.29 |
| 78 | 6.88 | 3.85 | 6.99 | 9.26 | 9.08  | 6.03 | 7.17 | 6.94 | 2.76 | 5.02 | 6.37 | 3.33 |
| 79 | 6.16 | 4.46 | 5.90 | 6.58 | 8.27  | 6.79 | 7.66 | 6.97 | 2.77 | 4.73 | 4.42 | 3.06 |
| 80 | 6.70 | 4.83 | 5.34 | 7.89 | 8.77  | 6.54 | 8.53 | 6.66 | 2.76 | 4.32 | 6.84 | 3.04 |
| 81 | 6.93 | 3.76 | 4.97 | 6.30 | 9.48  | 6.64 | 7.78 | 6.34 | 2.77 | 5.12 | 5.96 | 2.99 |
| 82 | 6.32 | 3.41 | 4.82 | 6.75 | 8.94  | 5.66 | 7.95 | 6.12 | 2.77 | 4.62 | 5.12 | 2.90 |
| 83 | 6.50 | 4.25 | 5.37 | 5.46 | 9.00  | 6.13 | 6.99 | 6.07 | 2.77 | 5.19 | 7.73 | 3.09 |
| 84 | 6.68 | 4.29 | 6.19 | 6.19 | 8.26  | 6.09 | 6.51 | 6.36 | 2.77 | 4.32 | 4.18 | 3.00 |
| 85 | 6.97 | 4.17 | 5.47 | 9.51 | 8.98  | 6.02 | 8.15 | 6.29 | 2.76 | 4.75 | 4.77 | 2.95 |
| 86 | 6.88 | 5.08 | 5.57 | 7.06 | 8.15  | 5.19 | 7.69 | 6.90 | 2.76 | 3.93 | 5.34 | 3.06 |
